# Supplementary material
Source: PubMed Central journal article supplement (PMC9908450)
Supplement: ajtr0015-0476-f8.pdf [file ajtr0015-0476-f8.pdf]

# RNA-binding proteins predict prognosis of endometrial cancer

**Table S1.** Primer sequences

| Gene name | Primer sequence                |
|-----------|--------------------------------|
| CD3EAP    | Forward: GAGGATGCTGCTCGGTTCTCT |
|           | Reverse: CCTGAATAAGCCACAGCTCCG |
| SBDS      | Forward: CGGCTTCTGGGTCTTTGAACA |
|           | Reverse: ACCACGGCCACATTGGTTAG  |
| TDRKH     | Forward: CAGCGGTAAAGGCGAGGATG  |
|           | Reverse: GGCTTGCCAAGAAGTCCGT   |
| GAPDH     | Forward: CAGGAGGCATTGCTGATGAT  |
|           | Reverse: GAAGGCTGGGGCTCATT     |

**Table S2.** Sequences of siRNA

| Name           | Sequence                                  |
|----------------|-------------------------------------------|
| CD3EAP-Homo-81 | Sense (5'-3'): GAUGCUGCUCGGUUCUCUUTT      |
|                | Antisense (5'-3'): AAGAGAACCGAGCAGCAUCTT  |
| SBDS-HOMO-411  | Sense (5'-3'): CUGAAAUCUGUAAGCAGAU TT     |
|                | Antisense (5'-3'): AUCUGCUUACAGAUUUCAGTT  |
| TDRKH-Homo-718 | Sense (5'-3'): GCAUUUGAUACUGGAGAAATT      |
|                | Antisense (5'-3'): UUUUCUCCAGUAUCAAUUGCTT |

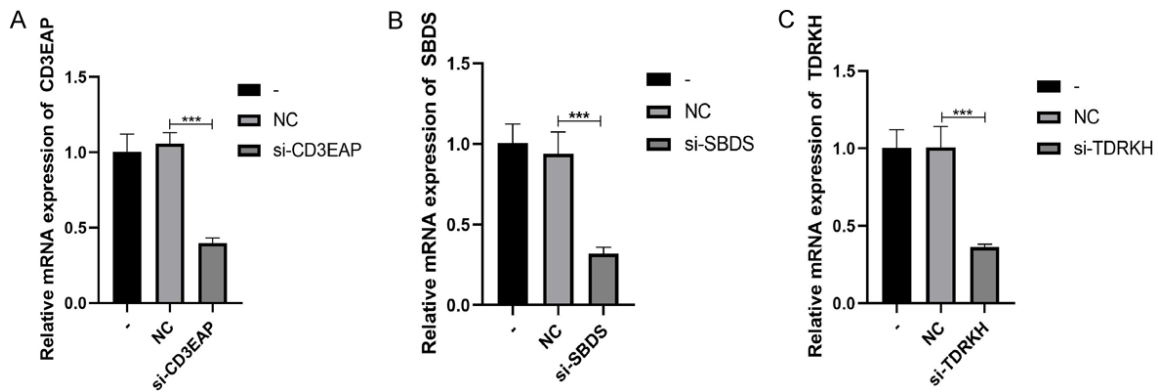

**Figure S1.** siRNA knockdown efficiency results for (A) CD3EAP, (B) SBDS, and (C) TDRKH.
